# Supplementary material for: Synthesis of manganese phosphate hybrid nanoflowers by collagen-templated biomineralization
Source: Royal Society of Chemistry journal article supplement (doi:10.1039/c7ra12628j), 2018-01-01
Supplement: c7ra12628j1.pdf [file c7ra12628j1.pdf]

## Supporting information

### Synthesis of manganese phosphate hybrid nanoflowers by collagen-templated biomineralization

Jean Claude Munyemana, Huixia He, Shenglong Ding, Jie Yin, Pinxian Xi, Jianxi Xiao

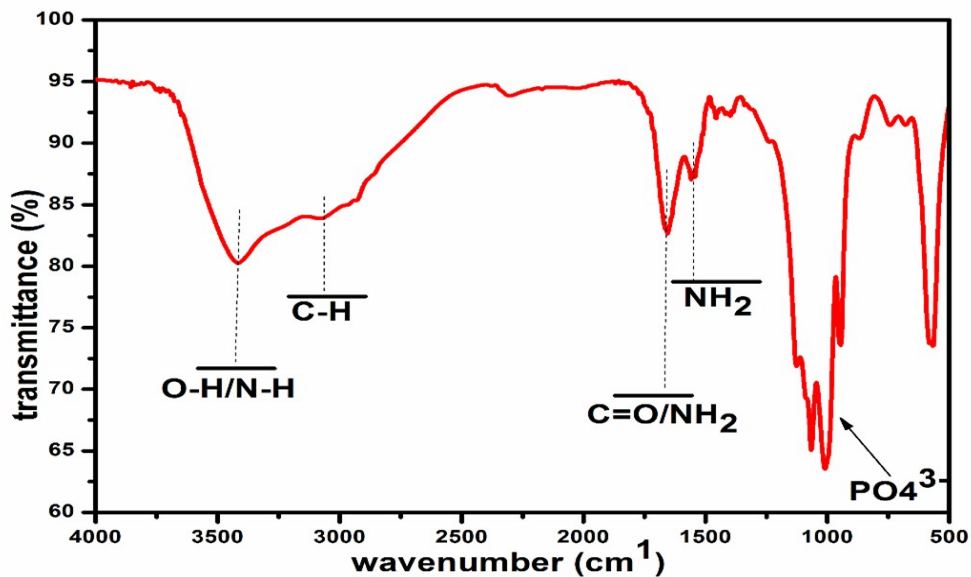

**Figure S1.** FT-IR spectra of the CL-Mn<sub>3</sub>(PO<sub>4</sub>)<sub>2</sub> hybrid nanomaterials prepared by incubating the mixture of 1.8 mM Mn(NO<sub>3</sub>)<sub>2</sub> and 0.2 wt % of CL protein in 20 mM PBS buffer at 25 °C for 24 hrs.

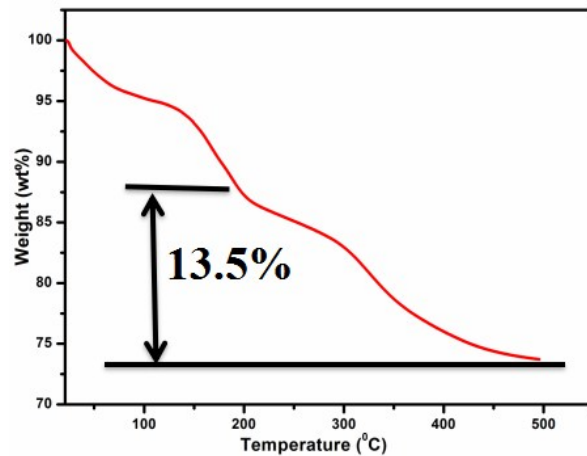

**Figure S2.** Thermogravimetric analysis (TGA) curves of the CL-Mn<sub>3</sub>(PO<sub>4</sub>)<sub>2</sub> hybrid nanomaterials obtained by incubating the mixture of 1.8 mM Mn(NO<sub>3</sub>)<sub>2</sub> and 0.2 wt % of CL protein in 20 mM PBS buffer at 25 °C for 24 hrs. The heating rate was 10 °C/min from 25 °C to 500 °C.
